# Supplementary material
Source: PubMed Central journal article supplement (PMC2722230)
Supplement: ddn429_1.pdf [file ddn429_1.pdf]

## Supplementary Table 1 – SNP Tagging details

---

| Total SNPs<br>MAF > 0.05<br>discovered | SNPs MAF > 0.05<br>in Caucasians | Tag SNPs<br>selected for $R_p^2$<br>> 0.8 | Usable Tag SNPs | Common<br>Caucasian SNPs<br>tagged with $R_p^2$ ><br>0.8 |
|----------------------------------------|----------------------------------|-------------------------------------------|-----------------|----------------------------------------------------------|
| 396                                    | 227                              | 68                                        | 60              | 219 (96%)                                                |

**Supplementary Table 2** Genotype Distributions of 60 Tag SNPs in Stage 1 (SEARCH Set 1). Values in the MAF column refer only to Controls. SNPs with results shown in **bold** progressed to Stage 2

\* Referent group

| Block | rs Number          | MAF  | Genotype | Controls | Cases | Odds Ratio<br>(95% CI) | Trend Test<br>P-Value |
|-------|--------------------|------|----------|----------|-------|------------------------|-----------------------|
| 1     | rs2077647          | 0.47 | AA       | 612      | 602   | 1*                     | 0.50                  |
|       |                    |      | AG       | 1177     | 1070  | 0.92 [0.80-1.06]       |                       |
|       |                    |      | GG       | 484      | 510   | 1.07 [0.91-1.27]       |                       |
| 1     | rs746432           | 0.1  | CC       | 1847     | 1807  | 1*                     | 0.31                  |
|       |                    |      | CG       | 396      | 342   | 0.88 [0.75-1.03]       |                       |
|       |                    |      | GG       | 17       | 22    | 1.32 [0.70-2.50]       |                       |
| 1     | rs532010           | 0.38 | TT       | 850      | 798   | 1*                     | 0.20                  |
|       |                    |      | TC       | 1089     | 1027  | 1.00 [0.88-1.14]       |                       |
|       |                    |      | CC       | 309      | 335   | 1.15 [0.96-1.39]       |                       |
| 1     | rs7766762          | 0.13 | AA       | 1721     | 1671  | 1*                     | 0.37                  |
|       |                    |      | AG       | 513      | 448   | 0.90 [0.78-1.04]       |                       |
|       |                    |      | GG       | 30       | 35    | 1.20 [0.73-1.97]       |                       |
| 1     | rs3778610          | 0.01 | AA       | 2217     | 2134  | 1*                     | 0.73                  |
|       |                    |      | AG       | 61       | 53    | 0.90 [0.62-1.31]       |                       |
|       |                    |      | GG       | 0        | 1     | 103.9 [0.0-37.3]       |                       |
| 2     | rs3853251          | 0.33 | TT       | 1020     | 921   | 1*                     | 0.09                  |
|       |                    |      | TC       | 988      | 993   | 1.11 [0.98-1.26]       |                       |
|       |                    |      | CC       | 258      | 263   | 1.13 [0.93-1.37]       |                       |
| 2     | rs2234693<br>PvuII | 0.46 | TT       | 669      | 628   | 1*                     | <b>0.36</b>           |
|       |                    |      | TC       | 1128     | 1073  | 1.01 [0.88-1.16]       |                       |
|       |                    |      | CC       | 471      | 480   | 1.09 [0.92-1.28]       |                       |
| 2     | rs9340799<br>XbaI  | 0.35 | AA       | 933      | 799   | 1*                     | <b>0.06</b>           |
|       |                    |      | AG       | 972      | 931   | 1.12 [0.98-1.27]       |                       |
|       |                    |      | GG       | 265      | 263   | 1.16 [0.95-1.41]       |                       |
| 3     | rs1709182          | 0.36 | TT       | 915      | 820   | 1*                     | <b>0.09</b>           |
|       |                    |      | TC       | 1019     | 1024  | 1.12 [0.99-1.27]       |                       |
|       |                    |      | CC       | 308      | 313   | 1.13 [0.94-1.36]       |                       |
| 3     | rs1514348          | 0.39 | AA       | 830      | 748   | 1*                     | 0.04                  |
|       |                    |      | AC       | 1096     | 1064  | 1.08 [0.95-1.23]       |                       |
|       |                    |      | CC       | 343      | 372   | 1.20 [1.01-1.44]       |                       |
| 3     | rs2431260          | 0.27 | CC       | 1187     | 1111  | 1*                     | 0.45                  |
|       |                    |      | CG       | 863      | 821   | 1.02 [0.90-1.15]       |                       |
|       |                    |      | GG       | 175      | 139   | 0.85 [0.67-1.08]       |                       |
| 3     | rs1033181          | 0.07 | AA       | 1981     | 1910  | 1*                     | 0.29                  |
|       |                    |      | AG       | 284      | 258   | 0.94 [0.79-1.13]       |                       |
|       |                    |      | GG       | 12       | 6     | 0.52 [0.19-1.38]       |                       |
| 3     | rs2175898          | 0.48 | AA       | 616      | 592   | 1*                     | 0.65                  |
|       |                    |      | AG       | 1119     | 1099  | 1.02 [0.89-1.18]       |                       |
|       |                    |      | GG       | 542      | 500   | 0.96 [0.81-1.13]       |                       |
| 3     | rs9478249          | 0.40 | GG       | 806      | 816   | 1*                     | 0.07                  |
|       |                    |      | GT       | 1106     | 1029  | 0.92 [0.81-1.05]       |                       |
|       |                    |      | TT       | 363      | 315   | 0.86 [0.72-1.03]       |                       |

| Block | rs Number | MAF  | Genotype | Controls | Cases | Odds Ratio<br>(95% CI) | Trend Test<br>P-Value |
|-------|-----------|------|----------|----------|-------|------------------------|-----------------------|
| 3     | rs9340835 | 0.33 | GG       | 1018     | 950   | 1*                     | 0.35                  |
|       |           |      | GA       | 1002     | 989   | 1.06 [0.93-1.20]       |                       |
|       |           |      | AA       | 252      | 252   | 1.07 [0.88-1.30]       |                       |
| 3     | rs9322335 | 0.25 | CC       | 1301     | 1204  | 1*                     | 0.57                  |
|       |           |      | CT       | 826      | 859   | 1.12 [0.99-1.27]       |                       |
|       |           |      | TT       | 152      | 124   | 0.88 [0.69-1.13]       |                       |
| 3     | rs9371559 | 0.09 | CC       | 1868     | 1803  | 1*                     | 0.42                  |
|       |           |      | CG       | 370      | 354   | 0.99 [0.85-1.16]       |                       |
|       |           |      | GG       | 23       | 12    | 0.54 [0.27-1.09]       |                       |
| 3     | rs9322337 | 0.04 | CC       | 2121     | 2032  | 1*                     | 0.76                  |
|       |           |      | CA       | 152      | 155   | 1.06 [0.84-1.34]       |                       |
|       |           |      | AA       | 4        | 2     | 0.52 [0.10-2.85]       |                       |
| 3     | rs6557168 | 0.37 | TT       | 898      | 849   | 1*                     | 0.99                  |
|       |           |      | TC       | 1037     | 1011  | 1.03 [0.91-1.17]       |                       |
|       |           |      | CC       | 315      | 291   | 0.98 [0.81-1.18]       |                       |
| 4a    | rs9322340 | 0.24 | CC       | 1308     | 1269  | 1*                     | 0.79                  |
|       |           |      | CT       | 848      | 780   | 0.95 [0.84-1.07]       |                       |
|       |           |      | TT       | 199      | 137   | 1.19 [0.92-1.54]       |                       |
| 4a    | rs9340851 | 0.06 | TT       | 2012     | 1938  | 1*                     | 0.87                  |
|       |           |      | TC       | 261      | 236   | 0.94 [0.78-1.13]       |                       |
|       |           |      | CC       | 6        | 11    | 1.90 [0.70-5.16]       |                       |
| 4a    | rs4365941 | 0.05 | GG       | 2069     | 2001  | 1*                     | 0.47                  |
|       |           |      | GA       | 198      | 182   | 0.95 [0.77-1.17]       |                       |
|       |           |      | AA       | 7        | 4     | 0.59 [0.17-2.02]       |                       |
| 4a    | rs1606678 | 0.09 | GG       | 1878     | 1821  | 1*                     | 0.63                  |
|       |           |      | GA       | 376      | 337   | 0.92 [0.79-1.09]       |                       |
|       |           |      | AA       | 16       | 21    | 1.35 [0.70-2.60]       |                       |
| 4a    | rs2347923 | 0.35 | AA       | 937      | 893   | 1*                     | 0.52                  |
|       |           |      | AC       | 1048     | 1000  | 1.00 [0.88-1.14]       |                       |
|       |           |      | CC       | 270      | 279   | 1.08 [0.90-1.31]       |                       |
| 4a    | rs988328  | 0.15 | AA       | 1662     | 1559  | 1*                     | 0.32                  |
|       |           |      | AG       | 565      | 576   | 1.09 [0.95-1.24]       |                       |
|       |           |      | GG       | 52       | 49    | 1.00 [0.68-1.49]       |                       |
| 4a    | rs4583998 | 0.32 | GG       | 1040     | 1005  | 1*                     | 0.66                  |
|       |           |      | GA       | 1026     | 957   | 0.97 [0.85-1.09]       |                       |
|       |           |      | AA       | 207      | 223   | 1.11 [0.91-1.37]       |                       |
| 4a    | rs1801132 | 0.22 | CC       | 1367     | 1301  | 1*                     | 0.40                  |
|       |           |      | CG       | 805      | 777   | 1.01 [0.90-1.15]       |                       |
|       |           |      | GG       | 102      | 114   | 1.17 [0.89-1.55]       |                       |
| 4b    | rs3020314 | 0.31 | TT       | 1078     | 937   | 1*                     | <b>0.003</b>          |
|       |           |      | TC       | 984      | 1007  | 1.18 [1.04-1.33]       |                       |
|       |           |      | CC       | 213      | 236   | 1.27 [1.04-1.56]       |                       |
| 4b    | rs3020317 | 0.19 | TT       | 1494     | 1389  | 1*                     | <b>0.10</b>           |
|       |           |      | TC       | 707      | 705   | 1.07 [0.94-1.22]       |                       |
|       |           |      | CC       | 76       | 90    | 1.27 [0.93-1.74]       |                       |
| 4b    | rs985191  | 0.12 | AA       | 1749     | 1640  | 1*                     | 0.13                  |
|       |           |      | AC       | 509      | 529   | 1.11 [0.96-1.27]       |                       |
|       |           |      | CC       | 19       | 21    | 1.18 [0.63-2.20]       |                       |
| 4b    | rs3003925 | 0.21 | AA       | 1421     | 1370  | 1*                     | 0.60                  |
|       |           |      | AG       | 779      | 717   | 0.95 [0.84-1.08]       |                       |
|       |           |      | GG       | 79       | 101   | 1.33 [0.98-1.80]       |                       |

| Block | rs Number              | MAF  | Genotype | Controls | Cases | Odds Ratio<br>(95% CI) | Trend Test<br>P-Value |
|-------|------------------------|------|----------|----------|-------|------------------------|-----------------------|
| 4c    | rs6557178              | 0.18 | AA       | 1515     | 1417  | 1*                     | 0.25                  |
|       |                        |      | AG       | 687      | 693   | 1.08 [0.95-1.23]       |                       |
|       |                        |      | GG       | 68       | 69    | 1.08 [0.77-1.53]       |                       |
| 4c    | rs7382115              | 0.17 | AA       | 1587     | 1485  | 1*                     | 0.23                  |
|       |                        |      | AG       | 611      | 618   | 1.08 [0.95-1.23]       |                       |
|       |                        |      | GG       | 71       | 73    | 1.10 [0.79-1.53]       |                       |
| 4c    | rs1884054              | 0.35 | AA       | 943      | 842   | 1*                     | 0.03                  |
|       |                        |      | AC       | 1058     | 1056  | 1.12 [0.99-1.27]       |                       |
|       |                        |      | CC       | 270      | 288   | 1.19 [0.99-1.44]       |                       |
| 4c    | rs3020404              | 0.30 | AA       | 1143     | 1109  | 1*                     | 0.44                  |
|       |                        |      | AG       | 921      | 896   | 1.00 [0.89-1.13]       |                       |
|       |                        |      | GG       | 211      | 181   | 0.88 [0.71-1.10]       |                       |
| 4c    | rs3020405              | 0.30 | AA       | 1105     | 981   | 1*                     | 0.008                 |
|       |                        |      | AG       | 971      | 976   | 1.13 [1.00-1.28]       |                       |
|       |                        |      | GG       | 183      | 208   | 1.28 [1.03-1.59]       |                       |
| 4c    | rs726282               | 0.09 | CC       | 1878     | 1749  | 1*                     | 0.02                  |
|       |                        |      | CA       | 385      | 423   | 1.18 [1.01-1.37]       |                       |
|       |                        |      | AA       | 15       | 20    | 1.43 [0.73-2.81]       |                       |
| 4c    | rs926777               | 0.24 | CC       | 1311     | 1187  | 1*                     | <b>0.008</b>          |
|       |                        |      | CA       | 854      | 868   | 1.12 [0.99-1.27]       |                       |
|       |                        |      | AA       | 110      | 135   | 1.36 [1.04-1.76]       |                       |
| 4c    | rs3020407              | 0.30 | AA       | 1112     | 979   | 1*                     | 0.006                 |
|       |                        |      | AG       | 962      | 987   | 1.17 [1.03-1.32]       |                       |
|       |                        |      | GG       | 199      | 218   | 1.24 [1.01-1.54]       |                       |
| 4c    | rs2144025              | 0.13 | CC       | 1698     | 1588  | 1*                     | 0.11                  |
|       |                        |      | CT       | 542      | 548   | 1.08 [0.94-1.24]       |                       |
|       |                        |      | TT       | 36       | 46    | 1.37 [0.88-2.12]       |                       |
| 4d    | rs6916218              | 0.24 | TT       | 1301     | 1209  | 1*                     | 0.34                  |
|       |                        |      | TA       | 817      | 825   | 1.09 [0.96-1.23]       |                       |
|       |                        |      | AA       | 140      | 133   | 1.02 [0.80-1.31]       |                       |
| 4d    | rs7754762              | 0.11 | TT       | 1809     | 1727  | 1*                     | 0.56                  |
|       |                        |      | TA       | 447      | 437   | 1.02 [0.88-1.19]       |                       |
|       |                        |      | AA       | 20       | 24    | 1.26 [0.69-2.28]       |                       |
| 4d    | rs3020416              | 0.04 | CC       | 1510     | 1400  | 1*                     | 0.37                  |
|       |                        |      | CG       | 649      | 693   | 1.15 [1.01-1.31]       |                       |
|       |                        |      | GG       | 98       | 76    | 0.84 [0.61-1.14]       |                       |
| 4d    | rs926779               | 0.27 | GG       | 1224     | 1107  | 1*                     | 0.14                  |
|       |                        |      | GA       | 879      | 919   | 1.16 [1.02-1.31]       |                       |
|       |                        |      | AA       | 173      | 159   | 1.02 [0.81-1.28]       |                       |
| 4d    | rs2273207              | 0.08 | AA       | 1915     | 1810  | 1*                     | 0.14                  |
|       |                        |      | AG       | 342      | 353   | 1.09 [0.93-1.28]       |                       |
|       |                        |      | GG       | 9        | 15    | 1.76 [0.77-4.04]       |                       |
| 4d    | rs3020372              | 0.16 | TT       | 1631     | 1521  | 1*                     | 0.39                  |
|       |                        |      | TC       | 569      | 608   | 1.15 [1.00-1.31]       |                       |
|       |                        |      | CC       | 71       | 52    | 0.79 [0.55-1.13]       |                       |
| 4d    | rs3020376 <sup>1</sup> | 0.25 | AA       | 1365     | 1271  | 1*                     | 0.35                  |
|       |                        |      | AG       | 646      | 660   | 1.10 [0.96-1.25]       |                       |
|       |                        |      | GG       | 230      | 222   | 1.04 [0.85-1.27]       |                       |
| 4d    | rs2982896              | 0.21 | CC       | 1404     | 1303  | 1*                     | 0.33                  |
|       |                        |      | CT       | 746      | 754   | 1.09 [0.96-1.24]       |                       |
|       |                        |      | TT       | 109      | 102   | 1.01 [0.76-1.33]       |                       |

| Block | rs Number | MAF  | Genotype | Controls | Cases | Odds Ratio<br>(95% CI) | Trend Test<br>P-Value |
|-------|-----------|------|----------|----------|-------|------------------------|-----------------------|
| 4d    | rs2459107 | 0.32 | GG       | 1053     | 968   | 1*                     | 0.25                  |
|       |           |      | GA       | 981      | 982   | 1.09 [0.96-1.23]       |                       |
|       |           |      | AA       | 243      | 239   | 1.07 [0.88-1.31]       |                       |
| 5     | rs9341052 | 0.07 | AA       | 1969     | 1868  | 1*                     | 0.39                  |
|       |           |      | AG       | 293      | 309   | 1.11 [0.94-1.32]       |                       |
|       |           |      | GG       | 15       | 11    | 0.77 [0.35-1.69]       |                       |
| 5     | rs3778099 | 0.10 | TT       | 1854     | 1738  | 1*                     | 0.11                  |
|       |           |      | TC       | 405      | 424   | 1.12 [0.96-1.30]       |                       |
|       |           |      | CC       | 18       | 22    | 1.30 [0.70-2.44]       |                       |
| 5     | rs2747647 | 0.11 | CC       | 1816     | 1752  | 1*                     | 0.83                  |
|       |           |      | CG       | 433      | 415   | 0.99 [0.86-1.15]       |                       |
|       |           |      | GG       | 24       | 21    | 0.91 [0.50-1.64]       |                       |
| 5     | rs3020384 | 0.26 | CC       | 1268     | 1162  | 1*                     | 0.54                  |
|       |           |      | CG       | 834      | 891   | 1.17 [1.03-1.32]       |                       |
|       |           |      | GG       | 176      | 137   | 0.85 [0.67-1.08]       |                       |
| 5     | rs9341066 | 0.07 | GG       | 1980     | 1925  | 1*                     | 0.37                  |
|       |           |      | GA       | 289      | 253   | 0.90 [0.75-1.08]       |                       |
|       |           |      | AA       | 6        | 8     | 1.37 [0.47-3.96]       |                       |
| 5     | rs2228480 | 0.19 | GG       | 1490     | 1420  | 1*                     | 0.56                  |
|       |           |      | GA       | 695      | 671   | 1.01 [0.89-1.15]       |                       |
|       |           |      | AA       | 91       | 97    | 1.12 [0.83-1.50]       |                       |
| 5     | rs3798577 | 0.46 | AA       | 638      | 616   | 1*                     | 0.75                  |
|       |           |      | AG       | 1155     | 1088  | 0.98 [0.85-1.12]       |                       |
|       |           |      | GG       | 478      | 477   | 1.03 [0.87-1.22]       |                       |
| 5     | rs1062577 | 0.07 | TT       | 1970     | 1877  | 1*                     | 0.61                  |
|       |           |      | TA       | 284      | 294   | 1.09 [0.91-1.29]       |                       |
|       |           |      | AA       | 13       | 8     | 0.65 [0.27-1.56]       |                       |
| 5     | rs2813544 | 0.22 | AA       | 1370     | 1371  | 1*                     | 0.19                  |
|       |           |      | AG       | 801      | 711   | 0.89 [0.78-1.01]       |                       |
|       |           |      | GG       | 100      | 101   | 1.01 [0.76-1.34]       |                       |
| 5     | rs1543404 | 0.46 | GG       | 667      | 639   | 1*                     | 0.98                  |
|       |           |      | GA       | 1111     | 1067  | 1.00 [0.87-1.15]       |                       |
|       |           |      | AA       | 497      | 475   | 1.00 [0.84-1.18]       |                       |
| 5     | rs2747652 | 0.48 | CC       | 616      | 592   | 1*                     | 0.69                  |
|       |           |      | CT       | 1100     | 1066  | 1.01 [0.88-1.16]       |                       |
|       |           |      | TT       | 531      | 492   | 0.96 [0.82-1.14]       |                       |
| 5     | rs2813549 | 0.24 | TT       | 1311     | 1247  | 1*                     | 0.51                  |
|       |           |      | TC       | 834      | 796   | 1.00 [0.89-1.14]       |                       |
|       |           |      | CC       | 127      | 137   | 1.13 [0.88-1.46]       |                       |

All genotype distributions in controls conform to Hardy-Weinberg equilibrium with  $p > 0.01$  with the exception of <sup>1</sup> where no obvious reason for the deviation could be ascertained.

**Supplementary Table 3** Results for SNPs, tagged by rs3020314, in SEARCH Set 1.

| rs Number | MAF  | Rp2 with<br>rs3020314 | Genotype | Controls | Cases | Odds Ratio<br>(95% CI) | Trend<br>Test<br>P-Value |
|-----------|------|-----------------------|----------|----------|-------|------------------------|--------------------------|
| rs3020314 | 0.31 | *                     | TT       | 1078     | 937   | 1*                     | <b>0.003</b>             |
|           |      |                       | TC       | 984      | 1007  | 1.18 [1.04-1.33]       |                          |
|           |      |                       | CC       | 213      | 236   | 1.27 [1.04-1.56]       |                          |
| rs3020377 | 0.31 | 0.99                  | AA       | 1078     | 945   | 1*                     | <b>0.004</b>             |
|           |      |                       | AG       | 982      | 1001  | 1.16 [1.03-1.32]       |                          |
|           |      |                       | GG       | 213      | 237   | 1.27 [1.03-1.56]       |                          |
| rs3020390 | 0.31 | 0.98                  | CC       | 1083     | 951   | 1*                     | <b>0.005</b>             |
|           |      |                       | CT       | 988      | 1005  | 1.06 [1.02-1.31]       |                          |
|           |      |                       | TT       | 207      | 231   | 1.27 [1.03-1.56]       |                          |
| rs3020394 | 0.31 | 0.96                  | TT       | 1083     | 941   | 1*                     | <b>0.003</b>             |
|           |      |                       | TC       | 968      | 1002  | 1.19 [1.05-1.35]       |                          |
|           |      |                       | CC       | 211      | 229   | 1.25 [1.02-1.54]       |                          |
| rs3020396 | 0.30 | 0.92                  | AA       | 1108     | 970   | 1*                     | <b>0.004</b>             |
|           |      |                       | AG       | 956      | 987   | 1.18 [1.04-1.33]       |                          |
|           |      |                       | GG       | 201      | 221   | 1.26 [1.02-1.55]       |                          |
| rs3020400 | 0.30 | 0.92                  | AA       | 1101     | 966   | 1*                     | <b>0.005</b>             |
|           |      |                       | AG       | 958      | 981   | 1.17 [1.03-1.32]       |                          |
|           |      |                       | GG       | 196      | 217   | 1.26 [1.02-1.56]       |                          |
| rs3020401 | 0.30 | 0.92                  | TT       | 1110     | 974   | 1*                     | <b>0.004</b>             |
|           |      |                       | TC       | 964      | 994   | 1.18 [1.04-1.33]       |                          |
|           |      |                       | CC       | 200      | 221   | 1.26 [1.02-1.55]       |                          |
| rs1884051 | 0.31 | 0.88                  | AA       | 1072     | 960   | 1*                     | <b>0.030</b>             |
|           |      |                       | AG       | 998      | 1004  | 1.12 [0.99-1.27]       |                          |
|           |      |                       | GG       | 208      | 223   | 1.20 [0.97-1.47]       |                          |

- Referent group

**Supplementary Table 4: Characteristics of the 28 studies within the Breast Cancer Association Consortium (BCAC)**

| Study name (Reference)                                                                                | Case definition and ascertainment                                                                                                                                                                                                                            | Control definition and ascertainment                                                                                                                                                                                                                      | Proportion participating                                                                                                        | No. of (cases) (controls) | Age range (cases) (controls) |
|-------------------------------------------------------------------------------------------------------|--------------------------------------------------------------------------------------------------------------------------------------------------------------------------------------------------------------------------------------------------------------|-----------------------------------------------------------------------------------------------------------------------------------------------------------------------------------------------------------------------------------------------------------|---------------------------------------------------------------------------------------------------------------------------------|---------------------------|------------------------------|
| <b>ABCFS 1</b><br>Australian Breast Cancer Family Study                                               | All cases diagnosed < age 40 plus a random sample of those diagnosed ages 40-59 from cancer registries in Victoria & New South Wales, plus a limited number diagnosed aged 60-69; cases living in Melbourne recruited from 1992-99 & in Sydney from 1993-98. | Identified from the electoral rolls in Melbourne from 1992-98 & Sydney from 1993-99. Frequency matched to cases by age in 5 year categories.                                                                                                              | 75% of cases & 68% of controls completed questionnaires, 71% of cases & 55% of controls provided a blood sample <sup>30</sup> . | 1096<br>606               | 20-68<br>18-69               |
| <b>ABCS 2</b><br>Amsterdam Breast Cancer Study                                                        | All cases aged <50 & diagnosed from 1974-1994 in 4 Dutch hospitals. Familial non-BRCA1/2 cases <50 from Clinical Genetic Centre in the Netherlands Cancer Institute                                                                                          | Random women <50 years of age at baseline From 2 population-based prospective studies by National Institute for Public Health & the Environment, The Netherlands.                                                                                         | 85% of cases & ~50% of controls                                                                                                 | 1320<br>551               | 23-50<br>20-50               |
| <b>BBCC 3</b><br>Bavarian Breast Cancer Cases and Controls                                            | Consecutive, unselected cases with invasive breast cancer at the University Breast Centre, Franconia in Northern Bavaria.                                                                                                                                    | Healthy women with no diagnosis of cancer aged 55 or older. Invited by a newspaper advertisement.                                                                                                                                                         | 95% of cases & 99% of controls provided a blood sample & an epidemiological questionnaire.                                      | 1009<br>816               | 22-95<br>>55                 |
| <b>BBCS 4</b><br>1) British Breast Cancer Study<br>2) Mammography Oestrogens and Growth Factors Study | 1) English & Scottish Cancer Registries All breast cancer cases who developed a first primary before age 65 in 1971 or later & who subsequently developed a second primary cancer. Unilateral breast cancer cases diagnosed before age 70 in 1971 or later.  | 1) A friend, sister-in-law or daughter-in-law of cases<br>2) Selected from a cohort of healthy women participating in a mammographic screening trial near the time of their final mammogram, frequency matched to cases on geographical area of residence | 1) 68% of cases & 76% of controls provided a blood sample.<br>2) 82% provided a blood sample.                                   | 676<br>732                | 25-70<br>24-81               |
| <b>CGPS 5</b><br>Copenhagen Breast Cancer Study and Copenhagen City Heart Study                       | Consecutive, incident cases from a hospital with centralized care for a population of 320,000 women from 2001 to the present.                                                                                                                                | Community controls with no history of breast cancer from the Copenhagen General Population Study. All controls were known to be breast cancer-free at the end of 2004.                                                                                    | 96% of cases & 56% of controls were interviewed & provided a blood sample.                                                      | 1948<br>2974              | 29-93<br>20-90               |
| <b>CNIO-BCS 6</b><br>Spanish National Cancer Centre Study                                             | Two groups of cases:<br>1) 574 consecutive breast cancer patients, unselected for family history, from 3 public hospitals, 2 in Madrid & one in Oviedo, from 2000 to 2005.<br>2) 290 cases with at                                                           | Women attending the Menopause Research Centre between 2000 & 2004 & female members of the College of Lawyers attending a free, targeted medical                                                                                                           | Not recorded.                                                                                                                   | 736<br>817                | 22-86<br>23-86               |

| Study name<br>(Reference)                                                                   | Case definition and<br>ascertainment                                                                                                                                                                  | Control definition<br>and<br>ascertainment                                                                                                                                                                   | Proportion<br>participating                                                                                    | No. of<br>(cases)<br>(controls) | Age range<br>(cases)<br>(controls) |
|---------------------------------------------------------------------------------------------|-------------------------------------------------------------------------------------------------------------------------------------------------------------------------------------------------------|--------------------------------------------------------------------------------------------------------------------------------------------------------------------------------------------------------------|----------------------------------------------------------------------------------------------------------------|---------------------------------|------------------------------------|
|                                                                                             | least one first degree relative also affected with breast cancer, recruited through the CNIO family cancer clinic in Madrid from 2000 to 2004.                                                        | check-up in 2005, all free of breast cancer                                                                                                                                                                  |                                                                                                                |                                 |                                    |
| <b>GENICA</b><br>7<br>Gene<br>Environment<br>Interaction and<br>Breast Cancer in<br>Germany | Incident cases enrolled between 2000 & 2004 from the Greater Bonn area; all enrolled within 6 months of diagnosis                                                                                     | Selected from population registries from 31 communities; matched to cases in 5-year age classes                                                                                                              | Response rate 88% for cases & 67% for controls. DNA for 89% & 88% respectively.                                | 945<br>984                      | 23-80<br>24-80                     |
| <b>GC-HBOC</b><br>8<br>German familial<br>breast cancer<br>study                            | Index patients from German breast cancer families non- <i>BRCA1</i> /2, collected 1996-2007 via Institute of Human Genetics, Heidelberg & Department of Gynaecology & Obstetrics, Cologne, Germany.   | Healthy, unrelated, ethnically matched female blood donors recruited in 2004 & 2007 by German Red Cross Blood Service of Baden-Württemberg-Hessen, Institute of Transfusion Medicine & Immunology, Mannheim. |                                                                                                                | 525<br>920                      | 20-87<br>19-68                     |
| <b>HABCS</b><br>9<br>Hannover Breast<br>Cancer Study                                        | Cases who received radiotherapy for breast cancer at Hannover Medical School between 1997-2003, unselected for age or family history                                                                  | Anonymous female blood bank donors at Hannover Medical School, collected from 8/2005-12/2005, with known age & ethnic background                                                                             | Approx. 80% of cases & 70% of controls contacted gave a blood sample                                           | 1044<br>1014                    | 25-91<br>18-68                     |
| <b>HEBCS</b><br>10<br>Helsinki Breast<br>Cancer Study                                       | Consecutive, incident cases (884) from Department of Oncology, Helsinki University Central Hospital 1997-8 & 2000                                                                                     | Healthy females recruited from the same geographical region in Southern Finland                                                                                                                              | 79% of all cases for the consecutive series                                                                    | 1455<br>1090                    | 21-96<br>18-65                     |
| <b>KARBAC</b><br>11<br>Karolinska Breast<br>Cancer study                                    | 1. Familial cases from Department of Clinical Genetics, Karolinska University Hospital, Stockholm<br>2. Consecutive cases from Department of Oncology, Huddinge & Söder Hospital, Stockholm 1998-2000 | Blood donors of mixed gender from same geographical region                                                                                                                                                   | 1. NA<br>2. 70% of consecutive cases provided a blood-sample                                                   | 819<br>863                      | 24-92<br>Unknown                   |
| <b>KBCP</b><br>12<br>Kuopio Breast<br>Cancer Project                                        | Women at Kuopio University Hospital between 1990 & 1995 who were found to have breast cancer                                                                                                          | Age & long-term area-of-residence matched controls selected from the National Population Register & interviewed in parallel with the cases                                                                   | Cases: 98% of those contacted; 86% of those potentially eligible. Controls selected individually for each case | 455<br>397                      | 44-91<br>37-77                     |
| <b>kConFab/AOCS</b><br>13<br>Kathleen<br>Cunningham                                         | Cases were from multiple-case breast & breast-ovarian families recruited through family                                                                                                               | Female controls were ascertained by the Australian Ovarian Cancer                                                                                                                                            | 65% of female family members gave DNA<br>64% filled in                                                         | 264<br>820                      | 25-78<br>Unknown                   |



| Study name (Reference)                                                   | Case definition and ascertainment                                                                                                                                                                                                                                                                                                                                                                                                               | Control definition and ascertainment                                                                                                                                                                    | Proportion participating                                                                                   | No. of (cases) (controls)                        | Age range (cases) (controls)                             |
|--------------------------------------------------------------------------|-------------------------------------------------------------------------------------------------------------------------------------------------------------------------------------------------------------------------------------------------------------------------------------------------------------------------------------------------------------------------------------------------------------------------------------------------|---------------------------------------------------------------------------------------------------------------------------------------------------------------------------------------------------------|------------------------------------------------------------------------------------------------------------|--------------------------------------------------|----------------------------------------------------------|
| Foundation Consortium for Research into Familial Breast Cancer (kConFab) | cancer clinics from 1998 to the present. Non- <i>BRCA1/2</i> . Case was youngest breast cancer affected family member.                                                                                                                                                                                                                                                                                                                          | Study identified from the electoral rolls.                                                                                                                                                              | questionnaires                                                                                             |                                                  |                                                          |
| <b>MARIE 14</b><br>Mammary carcinoma risk factor investigation           | Incident and prevalent cases diagnosed from 2001-2005 in the study region Hamburg in Northern Germany, and from 2002-2005 in the study region Rhein-Neckar-Karlsruhe in Southern Germany.                                                                                                                                                                                                                                                       | 2 controls per case were randomly drawn from population registries and frequency matched by birth year to the case.                                                                                     | 64.1% of cases & 43.4% of controls participated                                                            | 1612<br>3203                                     | 50-75                                                    |
| <b>MCBCS 15</b><br>Mayo Clinic Breast Cancer Study                       | Incident cases residing in 6 states (MN, WI, IA, IL, ND, SD) seen at the Mayo Clinic in Rochester, MN from 2002-5                                                                                                                                                                                                                                                                                                                               | Women without cancer presenting for general medical examination at the Mayo Clinic. Controls were recruited concurrently with cases & were frequency matched to cases on age, ethnicity & county/state. | 68% cases, 77% controls were interviewed & provided a blood sample.                                        | 779<br>823                                       | 24-87<br>20-90                                           |
| <b>MCCS 16</b>                                                           | Incident cases diagnosed within the Melbourne Collaborative cohort study during the follow-up from baseline (1990-1994) to 2004 of the 24469 participating women                                                                                                                                                                                                                                                                                | Random sample of the initial cohort                                                                                                                                                                     | All incident cases and all the controls in the random sample. DNA available from >95% of the participants. | 476<br>576                                       | 37-80<br>37-70                                           |
| <b>MEC 17</b><br>Multiethnic Cohort                                      | Incident cases identified from SEER cancer registries in Los Angeles County & State registries in California & Hawaii, USA from 1993-2002. Grouped by self-reported ethnicity.                                                                                                                                                                                                                                                                  | Women without cancer from the same States, recruited concurrently with cases & frequency matched to cases by age at blood-draw & self-reported ethnicity.                                               | >60% for both cases & controls                                                                             | Japanese:<br>414<br>361<br>Whites:<br>391<br>403 | 65.0 (mean)<br>65.9 (mean)<br>65.3 (mean)<br>64-0 (mean) |
| <b>NBCS 18</b><br>Norwegian Breast Cancer Study                          | Incidence cases from three different hospitals: 1) Cases (114) mean age 64 (28-92) at Ullevål Univ. Hospital 1990-94, 2) cases (182) mean age 59 (26-75) referred to Norwegian Radium Hospital 1975-1986, 3) cases (124), mean age 56 (29-82) with stage I or II disease, in the Oslo micro-metastases study at Norwegian Radium Hospital between 1995-1998, 4) cases (71) mean age 67 (37-82) with locally advanced disease at Haukeland Univ. | Control subjects were healthy women, age 55-71, residing in Tromsø (440), and Bergen (109) attending the Norwegian Breast Cancer Screening Program.                                                     | 80-82% cases and 70% controls                                                                              | 590<br>1096                                      | 62.5 (26-92)                                             |

| Study name<br>(Reference)                                                                                 | Case definition and<br>ascertainment                                                                                                                                                                                                                   | Control definition<br>and<br>ascertainment                                                                                                            | Proportion<br>participating                                                                                                                        | No. of<br>(cases)<br>(controls) | Age range<br>(cases)<br>(controls) |
|-----------------------------------------------------------------------------------------------------------|--------------------------------------------------------------------------------------------------------------------------------------------------------------------------------------------------------------------------------------------------------|-------------------------------------------------------------------------------------------------------------------------------------------------------|----------------------------------------------------------------------------------------------------------------------------------------------------|---------------------------------|------------------------------------|
|                                                                                                           | Hospital.                                                                                                                                                                                                                                              |                                                                                                                                                       |                                                                                                                                                    |                                 |                                    |
| <b>NHS<br/>19</b><br>USA Nurses<br>Health Study                                                           | Incident cases arising in the sub-cohort of 32,826 cohort members who gave a blood specimen in 1989-1990 are included if they were diagnosed with breast cancer prior to July 1, 2000.                                                                 | Controls were women in this sub-cohort who were not diagnosed with breast cancer,                                                                     | All incident cases and selected controls are included.                                                                                             | 955<br>1631                     |                                    |
| <b>ORIGO<br/>20</b><br>Leiden University<br>Medical Centre<br>Breast Cancer<br>Study                      | Consecutive cases diagnosed 1996-2006 in 2 hospitals of South-West Netherlands (Leiden & Rotterdam). No selection for family history; Rotterdam cases selected for diagnosis aged <70. Cases with in situ carcinomas eligible.                         | Blood bank healthy donors from same geographical locale.                                                                                              | 80-90%                                                                                                                                             | 443<br>419                      | 21-87<br>Unknown                   |
| <b>PBCS<br/>21</b><br>Polish Breast<br>Cancer Study                                                       | Incident cases from 2000-3, identified through a rapid identification system in participating hospitals covering ~ 90% of all eligible cases; periodic check against the cancer registries in Warsaw & Łódź to assure complete identification of cases | Randomly selected from population lists of all residents of Poland, stratified & frequency matched to cases by case city & age in 5 year categories.  | 79% of eligible cases & 69% of eligible controls agreed to interview; 84% of interviewed cases & 94% of interviewed controls provided a DNA sample | 1957<br>2341                    | 20-74<br>20-74                     |
| <b>SASBAC<br/>22</b><br>Singapore and<br>Swedish Breast<br>Cancer Study                                   | Incident cases from October 1993 to March 1995 identified via the 6 regional cancer registries in Sweden, to which reporting is mandatory.                                                                                                             | Controls were randomly selected from the total population registry in 5-year age groups to match the expected age-frequency distribution among cases. | 84% of cases & 82% of controls from the total questionnaire, 87% & 74% of those donated DNA (overall 73% & 61% respectively).                      | 1292<br>1498                    | 50-74<br>50-74                     |
| <b>SEARCH Sets<br/>1/2<br/>23</b><br>Studies of<br>Epidemiology and<br>Risk Factors in<br>Cancer Heredity | Cases identified through East Anglian Cancer Registry; 1) prevalent cases diagnosed age <55 from 1991-6 & alive when study started in 1996; 2) incident cases diagnosed age < 70 from 1996 -2004.                                                      | Selected from the EPIC-Norfolk cohort study of 25,000 individuals age 45-74, based in the same geographic region as cases                             | 64% of eligible cases & 41% of invited controls provided a blood sample                                                                            | 4346<br>4541                    | 25-69<br>42-80                     |
| <b>SEARCH Set 3<br/>24</b>                                                                                | Ongoing Collection (as above) of incident cases diagnosed age < 70 from 2004 to 2007.                                                                                                                                                                  | Selected from the EPIC-Norfolk cohort study of 25,000 individuals age 45-74, based in the same geographic region as cases                             | 64% of eligible cases & 41% of invited controls provided a blood sample                                                                            | 2301<br>2273                    | 25-69<br>42-80                     |
| <b>SEBCS<br/>25</b><br>Seoul Breast<br>Cancer Study                                                       | Consecutive, incident, cases from 2 hospitals in Seoul recruited 2001-2005                                                                                                                                                                             | Healthy community controls from same catchment area & participating in annual health                                                                  | ~ 85% of cases, 75% of controls interviewed & provided a blood sample.                                                                             | 1724<br>1160                    | ≥40<br>≥ 40                        |

| Study name<br>(Reference)                                       | Case definition and<br>ascertainment                                                                                                                                                                                                                                                                 | Control definition<br>and<br>ascertainment                                                                                                                                                                                                  | Proportion<br>participating                                                                                 | No. of<br>(cases)<br>(controls) | Age range<br>(cases)<br>(controls)                           |
|-----------------------------------------------------------------|------------------------------------------------------------------------------------------------------------------------------------------------------------------------------------------------------------------------------------------------------------------------------------------------------|---------------------------------------------------------------------------------------------------------------------------------------------------------------------------------------------------------------------------------------------|-------------------------------------------------------------------------------------------------------------|---------------------------------|--------------------------------------------------------------|
|                                                                 |                                                                                                                                                                                                                                                                                                      | check-up, 2001-2005.                                                                                                                                                                                                                        |                                                                                                             |                                 |                                                              |
| <b>TWBCS<br/>26</b><br>Taiwanese Breast<br>Cancer study         | Incident cases<br>diagnosed & treated at<br>2 major teaching<br>hospitals in Taiwan;                                                                                                                                                                                                                 | Controls cancer-<br>free individuals,<br>randomly selected<br>from women<br>attending health<br>exam. at same<br>hospital during<br>study period.<br>Underwent 1-day<br>health examination<br>- any showing<br>evidence cancer<br>excluded. | >90% cases & ~<br>40% of controls                                                                           | 863<br>852                      | 30-70<br>30-70                                               |
| <b>UCIBCS<br/>27</b><br>UCI Breast<br>Cancer Study              | All cases diagnosed in<br>Orange County,<br>California, during one-<br>year period beginning<br>March 1, 1994.<br>Ascertained through<br>the population-based<br>Cancer Surveillance<br>Program of Orange<br>County California<br>(CSPOC)                                                            | Female control<br>under age 75<br>years without<br>history of cancer<br>recruited using<br>random digit<br>dialing among<br>Orange County<br>residents &<br>frequency matched<br>to cases by age &<br>race/ethnicity.                       |                                                                                                             | 1081<br>596                     |                                                              |
| <b>USRTS<br/>28</b><br>U.S. Radiologic<br>Technologist<br>Study | Prevalent cases<br>identified through<br>mailed surveys in<br>1983-8 & 1994-8,<br>incident cases<br>between surveys;<br>blood collected from<br>1999-2004; unselected<br>for family cancer<br>history or any other<br>characteristics; most<br>cases sampled more<br>than 5 years after<br>diagnosis | Selected from<br>women within the<br>cohort without<br>breast cancer as of<br>1999, blood<br>collected between<br>2000-2004;<br>matched to cases<br>on year of birth in<br>5-year strata                                                    | 62% of cases &<br>48% of controls<br>contacted agreed<br>to provide a<br>blood sample &<br>were interviewed | 704<br>1033                     | 19-84 t dx<br>41-99 at<br>interview<br>41-91 at<br>interview |

- 1 Dite, G.S. et al. Familial risks, early-onset breast cancer, and BRCA1 and BRCA2 germline mutations. *J. Natl. Cancer Inst.*, **95**, 448-57 (2003).
- 2 M. K. Schmidt, et al. Breast Cancer Survival and Tumor Characteristics in Premenopausal Women Carrying the CHEK2\*1100delC Germline Mutation, *J.C.O.*, **06**, 3024 (2006)  
M.K. Schmidt, et al. (2007). Do MDM2 SNP309 and TP53 R72P interact in breast cancer susceptibility? A large pooled series from the Breast Cancer Association Consortium. *Cancer Res.*, **67**, 9584-90 (2007)
- 3 Fasching PA, et al. Single nucleotide polymorphisms of the aromatase gene (CYP19A1), HER2/neu status, and prognosis in breast cancer patients. *Breast Cancer Res Treat.* DOI 10.1007/s10549-007-9822-2 (2007)  
Schrauder M, et al. Single nucleotide polymorphism D1853N of the ATM gene may alter the risk for breast cancer. *J. Cancer Res. Clin. Oncol.*, **134**, 873-82 (2008).
- 4 Johnson, N. et al. Interaction between CHEK2\*1100delC and other low-penetrance breast-cancer susceptibility genes: a familial study. *Lancet*, **366**, 1554-7 (2005).  
Fletcher, O. et al. Inconsistent association between the STK15 F311 genetic polymorphism and breast cancer risk. *J. Natl. Cancer. Inst.*, **98**, 1014-8 (2006).
- 5 Bojesen, S.E et al. No association of breast cancer risk with integrin beta3 (ITGB3) Leu33Pro genotype. *Br. J. Cancer*, **93**, 167-171 (2005).  
Weischer, M. et al. Increased Risk of Breast Cancer Associated With CHEK2\*1100delC. *J. Clin. Oncol.*, (2006).
- 6 Ribas, G. et al. Evaluating HapMap SNP data transferability in a large-scale genotyping project involving 175 cancer-associated genes. *Hum. Genet.*, **118**, 669-79 (2006).  
Milne, RL et al. ERCC4 associated with breast cancer risk: a two stage case-control study using high throughput genotyping. *Cancer Res.*, **66**, 9420-7 (2006)
- 7 Pesch, B. et al. Factors modifying the association between hormone –replacement therapy and breast cancer risk. *Eur. J. Epidemiol.*, 20:699-711 (2005)
- 8 Wirtenberger, M., et al. Associations of genetic variants in the estrogen receptor coactivators PPARGC1A, PPARGC1B and EP300 with familial breast cancer. *Carcinogenesis*, **27**, 2201-2208 (2006)  
Frank, B. et al. Association of the CASP10 V410I variant with reduced familial breast cancer risk and interaction with the CASP8 D302H variant. *Carcinogenesis*, **27**, 606-9 (2006)
- 9 Dork, T. et al. Spectrum of ATM gene mutations in a hospital-based series of unselected breast cancer patients. *Cancer Res.*, **61**, 7608-7615 (2001).
- 10 Syrjäkoski, K. et al. Population-based study of BRCA1 and BRCA2 mutations in 1035 unselected Finnish breast cancer patients. *J. Natl. Cancer Inst.*, **92**, 1529-31 (2000).  
Kilpivaara, O. et al. Correlation of CHEK2 protein expression and c.1100delC mutation status with tumor characteristics among unselected breast cancer patients. *Int J. Cancer*, **113**, 575-80 (2005).
- 11 Lindblom, A. et al. Hereditary breast cancer in Sweden: a predominance of maternally inherited cases. *Breast Cancer Res. Treat.*, **24**, 159-65 (1992)  
Margolin S. et al. BRCA1 mutations in a population –based study of breast cancer in Stockholm County. *Genet. Test.*, **8**, 127-32 (2004)
- 12 Mannisto, S. et al. Body-size indicators and risk of breast cancer according to menopause and estrogen-receptor status. *Int. J. Cancer*, **68**, 8-13 (1996).

- Hartikainen, J.M. et al. An autosome-wide scan for linkage disequilibrium-based association in sporadic breast cancer cases in eastern Finland: three candidate regions found. *Cancer Epidemiol. Biomarkers Prev.*, **14**, 75-80 (2005).
- 13 Mann, G.J. et al. Analysis of cancer risk and BRCA1 and BRCA2 mutation prevalence in the kConFab familial breast cancer resource. *Breast Cancer Res.*, **8**, R12 (2006).
- Renwick, A. et al. Mutations that cause ataxia-telangiectasia are breast cancer susceptibility alleles. *Nat. Genet.*, **38**, 873-5 (2006).
- Beesley, J et al. Association between single nucleotide polymorphisms in hormone metabolism and DNA repair genes and epithelial ovarian cancer: Results from two Australian studies and an additional validation set. *Cancer Epidemiol. Biomarkers Prev.*, **12**, 2257-65 (2007).
- 14 Kropp, S et al. Good agreement between physician and self-reported hormone therapy data in a case-control study *J. Clin. Epidemiol.*, **60**, 1280-7 (2007)
- 15 Olson, JE. et al. A comprehensive examination of CYP19 variation and breast density. *Cancer Epidemiol. Biomarkers Prev.* **16**, 623-5 (2007)
- 16 Giles GG. Et al. The Melbourne Collaborative Cohort Study. *IARC Sci. Publ.*, **156**, 69-70 (2002)
- 17 Kolonel, L. N. et al. A multi-ethnic cohort in Hawaii and Los Angeles; Baseline characteristics. *Am. J. Epidemiol.*, **151**, 346-357 (2000)
- 18 Nordgard SH. et al. Genome-wide analysis identifies 16q deletion associated with survival, molecular subtypes, mRNA expression, and germline haplotypes in breast cancer patients. *Genes Chromosomes Cancer*, **47**,680-96 (2008)
- 19 Hankinson SE. et al. Plasma sex steroid hormone levels and risk of breast cancer in post-menopausal women. *J. Natl. Cancer Inst.*, **96**,1866-9 (2004)
- 20 Huijts PE et al . Clinical correlates of low-risk variants in FGFR2, TNRC9, MAP3K1, LSP1 and 8q24 in a Dutch cohort of incident breast cancer cases. *Breast Cancer Res.*, **9**, R78 (2007).
- 21 Garcia-Closas, M. et al. Polymorphisms in DNA double-strand break repair genes and risk of breast cancer: two population-based studies in USA and Poland, and meta-analyses. *Hum. Genet.*, **119**, 376-88 (2006).
- 22, 23 Lesueur, F. et al. Allelic association of the human homologue of the mouse modifier Ptprij with breast cancer. *Hum. Mol. Genet.*, **14**, 2349-56 (2005).
- 24 Lee, K.M. et al. Genetic polymorphisms of ataxia telangiectasia mutated and breast cancer risk. *Cancer Epidemiol. Biomarkers Prev.*, **14**, 821-5 (2005).
- 25 Wedren, S. et al. Oestrogen receptor alpha gene haplotype and postmenopausal breast cancer risk: a case control study. *Breast Cancer Res.*, **6**, R437-49 (2004).
- Magnusson, C. et al. Breast-cancer risk following long-term oestrogen- and oestrogen-progestin-replacement therapy. *Int J. Cancer*, **81**, 339-44 (1999).
- 26 Hsu, HM et al. Breast cancer risk is associated with genes encoding the DNA double-strand break repair Mre11/Rad50/Nbs1 complex. *Cancer Epidemiol. Biomarkers Prev.* **16**, 2024-32 (2007)
- 27 Anton-Culver, H.et al. Characteristics of BRCA1 mutations in a population-based case series of breast and ovarian cancer. *Eur. J. Cancer*, **36**, 1200-8 (2000)
- Ziogas, A. et al. Cancer risk estimates for family members of a population-based family registry for breast and ovarian cancer. *Cancer Epidemiol. Biomarkers Prev.*, **9**, 103-11 (2000)
- 28 Sigurdson, A.J. et al. Kin-cohort estimates for familial breast cancer risk in relation to variants in DNA base excision repair, BRCA1 interacting and growth factor genes. *B.M.C. Cancer*, **4**, 9 (2004).

Sigurdson, A.J. et al. Cancer incidence in the US radiologic technologists health study, 1983-1998. *Cancer*, **97**, 3080-9 (2003).
